# Supplementary material for: A novel photocatalytic microreactor bundle that does not require an electric power source
Source: Royal Society of Chemistry journal article supplement (doi:10.1039/c2cc33525e), 2012-01-01
Supplement: c2cc33525e.pdf [file c2cc33525e.pdf]

## Supporting information

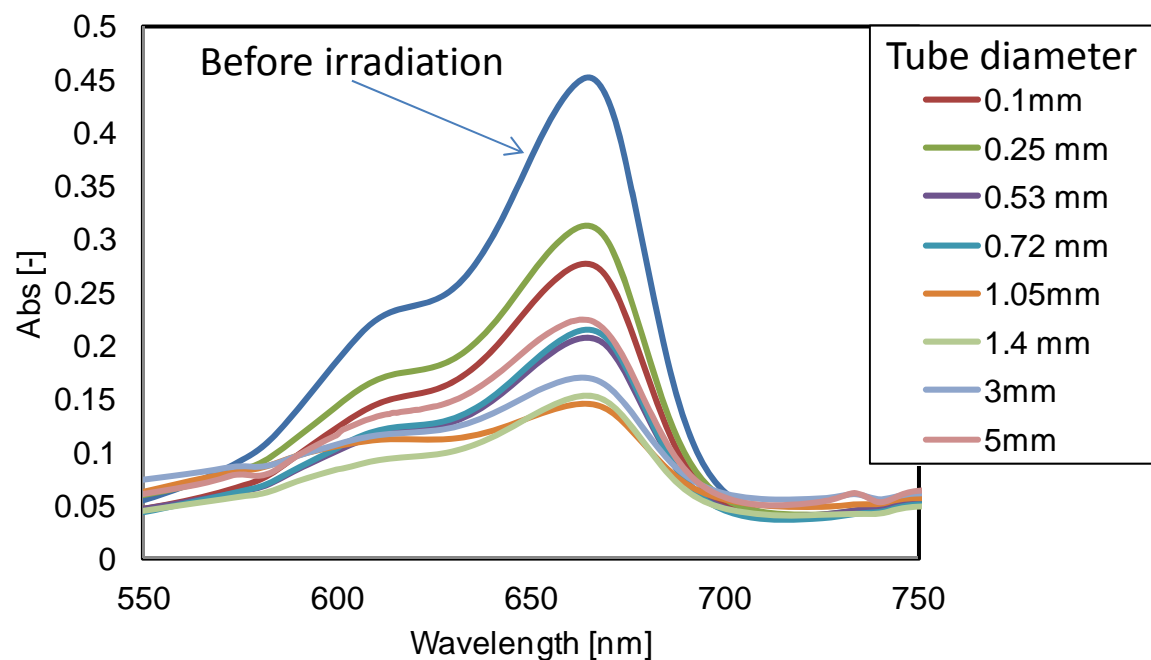

Fig.S1 The dependence of the inner diameter of photocatalytic microreactors on the absorption spectra of methylene blue solutions (10  $\mu\text{M}$ ) after 1.5 hours irradiation of sunlight.

## Supporting information

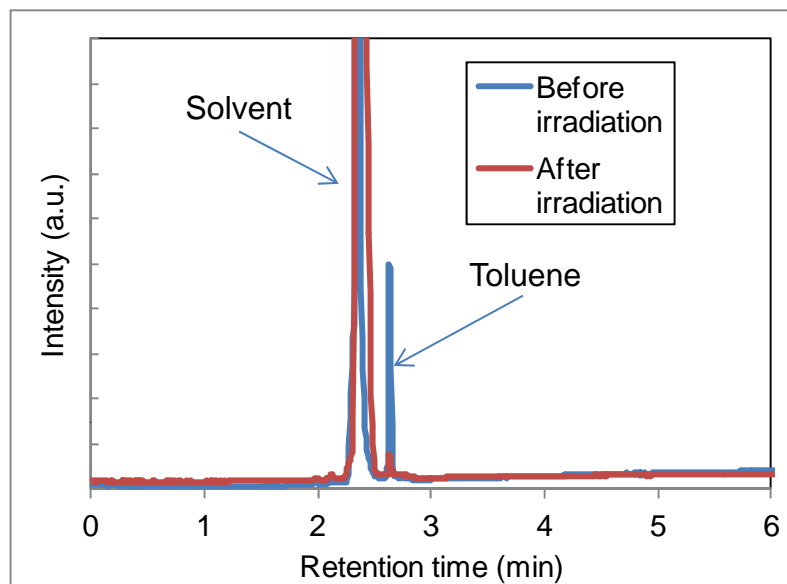

Fig.S2 HPLC charts for an aqueous toluene solution (1 mM) before and after irradiation of sunlight for 3 hours.
